# Supplementary material for: Prognostic significance of NAB2–STAT6 fusion variants and TERT promotor mutations in solitary fibrous tumors/hemangiopericytomas of the CNS: not (yet) clear
Source: Springer Nature journal article supplement (doi:10.1007/s00401-019-01968-3), 2019-02-02
Supplement: MOESM2 [file 16468866]

**Prognostic significance of *NAB2*-*STAT6* fusion variants and *TERT* promotor mutations in solitary fibrous tumors/hemangiopericytomas of the CNS: Not (yet) clear.**

Rob Vogels1,2*, Nicolas Macagno3,4*, Klaus Griewank5, Patricia Groenen1, Marian Verdijk1, Judy Fonville2, Benno Kusters1,6, French and Dutch CNS SFT/HPC Consortium7, Dominique Figarella-Branger3,8, Pieter Wesseling9,10,11, Corinne Bouvier3,4, Uta Flucke1,10

1. Department of Pathology, Radboud University Medical Center, Nijmegen, The Netherlands
2. Department of Pathology, Stichting PAMM, Eindhoven, The Netherlands
3. Department of Pathology and Neuropathology, Timone Hospital, APHM, Marseille, France
4. Aix-Marseille University, INSERM, MMG, Marseille, France
5. Department of Dermatology, University Hospital Essen, Essen, Germany
6. Department of Pathology, Maastricht University Medical Center, Maastricht, The Netherlands
7. Author information French and Dutch CNS SFT/HPC Consortium in Supplementary material
8. Aix-Marseille University, CNRS, INP, Inst Neurophysiopathol, Marseille, France
9. Department of Pathology, Amsterdam Universities Medical Center/VU University Medical Center, Amsterdam, The Netherlands
10. Princess Máxima Center for Pediatric Oncology, Utrecht, The Netherlands
11. Department of Pathology, University Medical Center Utrecht, Utrecht, The Netherlands

*Authors contributed equally to this work

**Correspondence**:
Rob Vogels
Department of Pathology, Radboud University Medical Center, Nijmegen, The Netherlands
[Rob.Vogels@radboudumc.nl](mailto:Rob.Vogels@radboudumc.nl)

**Supplementary Information Text**

**Materials and Methods**

**Patient cohort and sample selection**
Patients with a diagnosis of meningeal SFT or HPC were retrospectively selected from the (referral) files of the authors. For each case, one representative tumor tissue block of the resection specimen was retrieved from the pathology archives of the participating hospitals and included for histomorphological assessment and gene fusion analysis.

Clinical data including age at first histological diagnosis and follow-up data were extracted from the patient files. Extradural metastatic disease was detected by imaging techniques (with no other malignancies known) and/or proven by histological assessment. Progression-free survival is counted in months from date of first histological diagnosis to date of diagnosis of the (first) local recurrence, growth of residual disease for which therapy was required or detection of metastasis. Overall survival is counted in months from date of first histological diagnosis to date of last known follow-up or date of death. Distinction was made between patients who died due to disease-related factors (i.e. disease-specific survival; DSS) and patients who died due to other causes.

This study was approved by the local scientific review board and was performed in accordance with the Code of Conduct of the Federation of Medical Scientific Societies in the Netherlands. The French Samples used in this study were stored and retrieved from the APHM Tumor Bank (authorization number: AC2018-31053; CRB BB-0033-00097), which respects the ethical charter of the French National Cancer Institute to store and deliver samples for scientific research according to the French Public Health Code (articles L. 1243-4 and R. 1243-61). All samples were obtained after informed consent from patients or their parents when the patients were under the age of 18. As this research was not interventional, it did not require an approval by an ethics committee. The French committee for the treatment of biomedical research information approved the data management of this study (C.C.T.I.R.S. - 09.084Ter).

**Assessment of histomorphological features**
Four µm thick sections were stained with hematoxylin and eosin and all cases were reviewed by three of the authors (UF, BK, RV). Diagnosis and WHO grade were assigned according to the 2016 WHO Classification of Tumours of the Central Nervous System [WHO]. The updated Marseille Grading System [Macagno 2018] was applied on all cases by two authors (NM, CB).
All cases were confirmed by STAT6 nuclear staining of tumor cells using an already published protocol [1].

***NAB2-STAT6* gene fusion analysis and *TERT* promoter mutation analysis**
*NAB2-STAT6* gene fusion analysis and *TERT* promoter mutation analysis was performed on all cases. Briefly, RNA was extracted from formalin-fixed, paraffin-embedded tissue using RNA-Bee-RNA isolation reagent (Bio-Connect BV, Huissen, the Netherlands). RNA quantity and quality were determined by a NanoDrop measurement (Fisher Scientific, Landsmeer, the Netherlands) and subsequently, cDNA synthesis was performed using Superscript II (Invitrogen Life Technologies Europe, Bleiswijk, the Netherlands) and random hexamers (Promega Nederland, Leiden, the Netherlands). The cDNA was tested by the reverse transcription-polymerase chain reaction (RT-PCR) for the HMBS (hydroxymethylbilase synthase) housekeeping gene using the primers forw150 5’-TGCCAGAGAAGAGTGTGGTG-3’ and rev150 5’-ATGATGGCACTGAACTCCTG-3’. Samples without cDNA template were amplified in parallel as negative controls.

For the detection of the most common *NAB2-STAT6* gene fusions, three primers in *NAB2* (NM_005967.3): forw 5’- CAAGTAGCCCGAGAGAGCAC-3’ (exon 3), forw 5’- CTCCACTGAAGAAGCTGAAAC-3’ (exon 4) and forw 5’-CTGTGTGCCTGCGAAGCC-3’ (exon 6) were used in combination with three primers in *STAT6* (NM_001178078.1): rev 5’-GGGAAAGTCGACATAGAGCC-3’ (exon 2), rev 5’-GAGCTGAGCAAGATCCCGG-3’ (exon 16) and rev 5’-TTCCACGGTCATCTTGATGG-3’ (exon 17). The PCR products were analyzed by agarose gel electrophoresis.PCR was applied to amplify the *TERT* promoter region using the following primers: hTERT-F: CAGCGCTGCCTGAAACTC and hTERT-R GTCCTGCCCCTTCACCTT, amplifying a 163-bp fragment spanning hot-spot mutations at positions 1,295,228 and 1,295,250 on chromosome 5. Sequencing was done on an Illumina MiSeq next generation sequencer. Adapter ligation and barcoding was done using the NEBNext Ultra DNA Library Prep Mastermix Set and NEBNext Multiplex Oligos from New England Biolabs. CLC Cancer Research Workbench software from QIAGEN**®** was performed for sequence analysis. Described briefly, the analysis workflow included adapter trimming and read pair merging before mapping to the human reference genome (hg19). Insertions and deletions as well as single nucleotide variants were detected. Additional information regarding potential mutation type, known single nucleotide polymorphisms and conservation scores was obtained by cross-referencing various databases (COSMIC, ClinVar, dbSNP, 1000 Genomes Project, HAPMAP and PhastCons-Conservation_scores_hg19).

**Statistical analysis**Statistical analysis was performed using IBM SPSS Statistics v22.0.
Comparison of different *NAB2-STAT6* fusion variants with various clinical and histomorphological parameters were evaluated by using the χ2- or Fisher’s exact test as appropriate.
Progression-free- and disease-specific overall survival were used as end points as defined above. Kaplan-Meier curves were plotted for visualizing survival in different *NAB2-STAT6* fusion variant groups and the log-rank test was used for comparing the difference between the groups. For survival analysis, patients who died due to complications of initial therapy (e.g. surgery or radiotherapy) were excluded.

**References**

1. Vogels RJ, Vlenterie M, Versleijen-Jonkers YM, Ruijter E, Bekers EM, Verdijk MA, Link MM, Bonenkamp JJ, van der Graaf WT, Slootweg PJ, Suurmeijer AJ, Groenen PJ, Flucke U (2014) Solitary fibrous tumor - clinicopathologic, immunohistochemical and molecular analysis of 28 cases. Diagnostic pathology 9:224. doi:10.1186/s13000-014-0224-6
